# Supplementary material
Source: PubMed Central journal article supplement (PMC5161678)
Supplement: NIHMS797560-supplement-7.pdf [file NIHMS797560-supplement-7.pdf]

Supplementary Figure 5

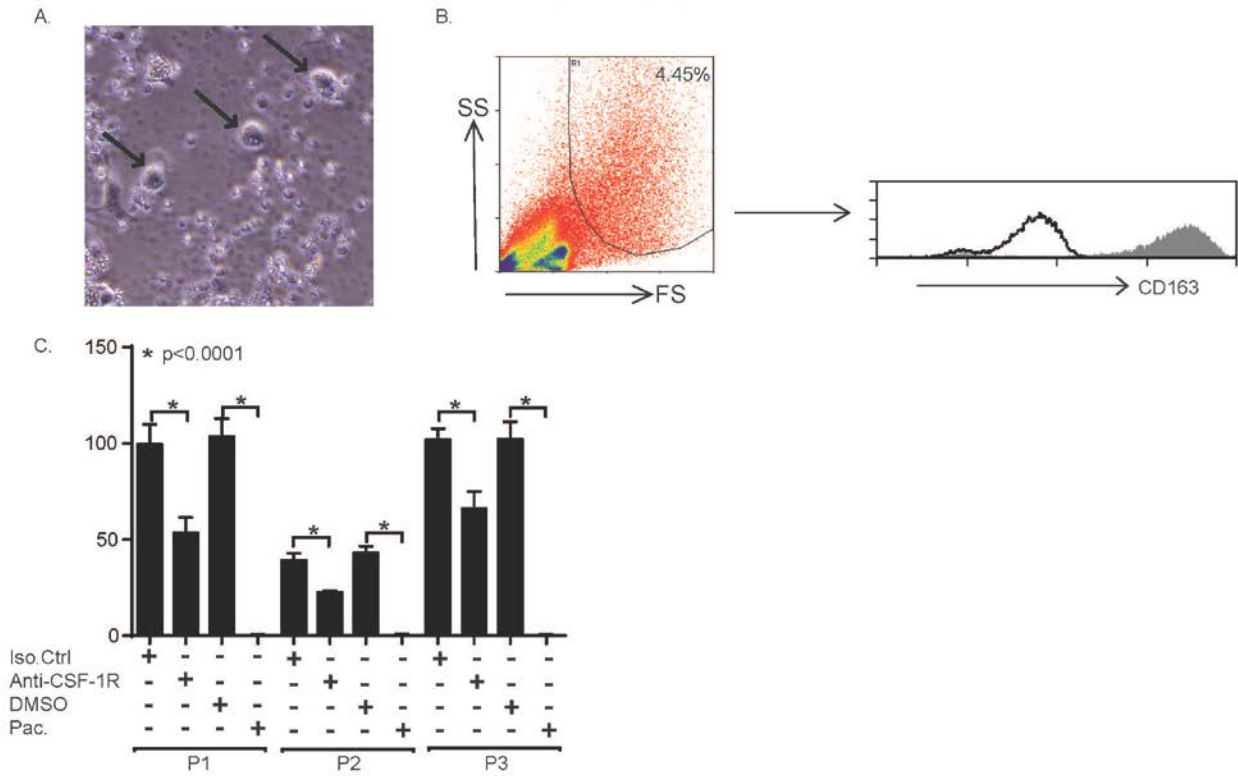

### Supplementary Figure 5

Generation of “nurse-like cells” in multiple myeloma. (A-C) Cryopreserved bone marrow aspirates obtained from multiple myeloma (MM) patients were cultured ( $3 \times 10^6$  /mL) in 24-well plates and treated, as indicated. NLC were identified by morphology (A) and by flow cytometry (B). NLC densities were determined (C). CSF-1R blockade or treatment with pacritinib impaired NLC generation in MM (3 representative patient samples are shown).
